# Supplementary material
Source: MDPI journal article supplement (https://www.mdpi.com/1424-2818/11/10/186)
Supplement: s1 [file s1]

**Suppl. Table 1.** Particle size distribution, chemical and hydrologic properties of the soil used in the trials.

| Parameter                                                                 | Value |
|---------------------------------------------------------------------------|-------|
| Particle size distribution (mm):                                          |       |
| Total sand ( $2 > \varnothing > 0.02$ ) ( $\text{g kg}^{-1}$ )            | 580   |
| Silt (%) ( $0.02 > \varnothing > 0.002$ ) ( $\text{g kg}^{-1}$ )          | 215   |
| Clay (%) ( $\varnothing < 0.002$ ) ( $\text{g kg}^{-1}$ )                 | 205   |
| Chemical properties:                                                      |       |
| Total nitrogen (Kjeldahl method) ( $\text{g kg}^{-1}$ )                   | 1.1   |
| Available phosphorus (Olsen method) ( $\text{mg kg}^{-1}$ )               | 23.5  |
| Exchangeable potassium ( $\text{BaCl}_2$ method) ( $\text{mg kg}^{-1}$ )  | 262   |
| Organic matter (Walkley Black method) ( $\text{g kg}^{-1}$ )              | 18    |
| Total limestone ( $\text{g kg}^{-1}$ )                                    | 24    |
| Active limestone ( $\text{g kg}^{-1}$ )                                   | 1.4   |
| pH                                                                        | 7.4   |
| ECe ( $\text{dS m}^{-1}$ )                                                | 0.4   |
| ESP                                                                       | 0.8   |
| CEC ( $\text{BaCl}_2$ method) ( $\text{meq kg}^{-1}$ of soil dry weight)  | 209   |
| Hydrologic properties:                                                    |       |
| Field capacity ( $\text{g kg}^{-1}$ of soil dry w)                        | 246   |
| Wilting point ( $-1.5 \text{ MPa}$ ) ( $\text{g kg}^{-1}$ of soil dry w.) | 125   |
| Bulk density ( $\text{t m}^{-3}$ )                                        | 1.5   |

ECe = saturation extract electrical conductivity; ESP = exchangeable sodium percentage; CEC = cation exchange capacity.
