# Supplementary material
Source: MDPI journal article supplement (https://www.mdpi.com/1424-2818/11/10/186)
Supplement: s1 [file s1]

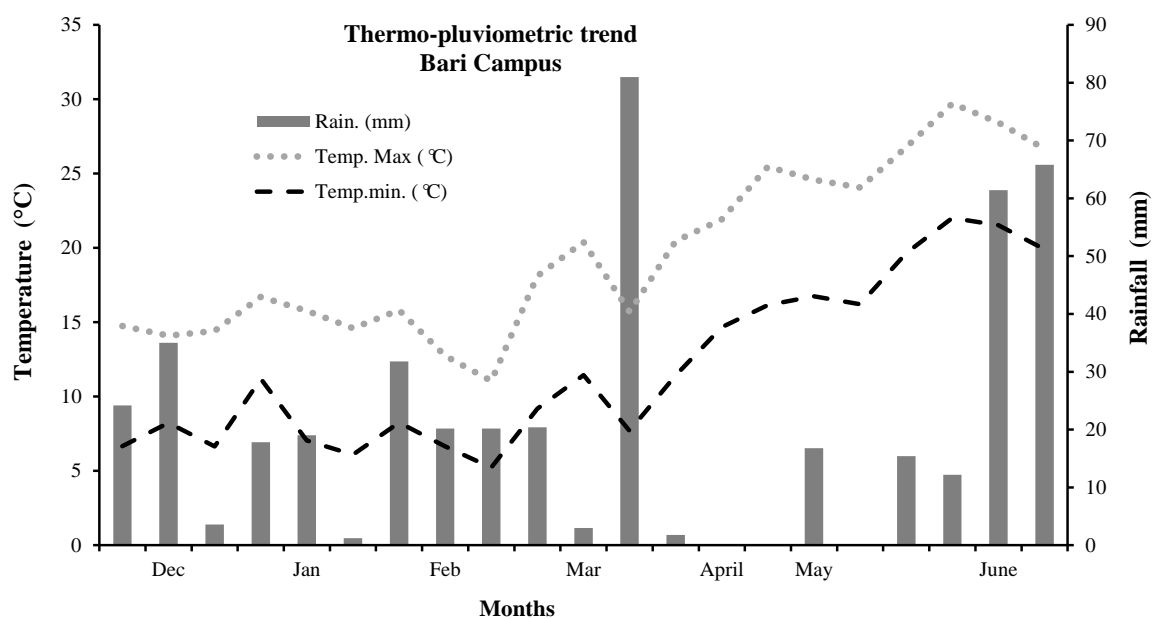

**Suppl. Figure 1.** Annual rainfall and average temperature data for the cropping season of 2016-2017 detected in the field trial of the University of Bari, Italy.
